# Supplementary material for: Oral health and the risk of head and neck squamous cell carcinoma: a multicenter case-control study in Iran
Source: Springer Nature journal article supplement (doi:10.1038/s41598-025-13570-7), 2025-08-12
Supplement: MOESM1 [file 41598_2025_13570_MOESM1_ESM.docx]

**Supplementary Material 1: Training Workshops and Quality Control**

**Training Workshops**

The training workshops for the personnel who conducted the oral health examinations were designed to ensure that they had the necessary knowledge and skills to accurately assess the number of missing, decayed, and filled teeth (DMFT index). The workshops were led by a senior dentist with expertise in oral health and consisted of the following components:

1. Theory session: A presentation on the importance of oral health, the DMFT index, and the criteria for assessing missing, decayed, and filled teeth.

2. Practical session: Hands-on training on how to assess the DMFT index, using a dental mirror and a probe, and how to record the findings on the standardized data collection form.

3. Case studies: Review of case studies to illustrate common scenarios and challenges in assessing the DMFT index.

4. Practice exercises: Participants practiced assessing the DMFT index on each other, under the supervision of the trainer.

**Quality Control**

To ensure the accuracy and consistency of the oral health examinations, a random sample of the registries was checked by the senior dentist. The quality control process consisted of the following steps:

1. Random selection: A random sample of 10% of the registries was selected for review.

2. Blinded review: The senior dentist reviewed the selected registries without knowing the identity of the participant or the interviewer.

3. Comparison with original data: The senior dentist compared the data recorded on the registry with the original data collected during the oral health examination.

4. Feedback and correction: Any discrepancies or errors were discussed with the interviewer, and corrections were made to the registry.
